# Supplementary material
Source: ML conference proceedings conference paper supplement (https://openreview.net/forum?id=RYrJqz44p4)
Supplement: supplementary_material [file attachment]

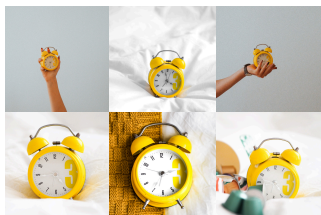

**Input Images: Clock**

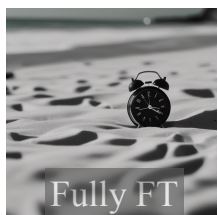

Fully FT

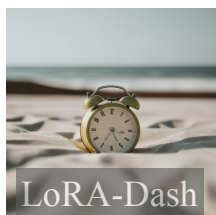

LoRA-Dash

Clock on the sea beach

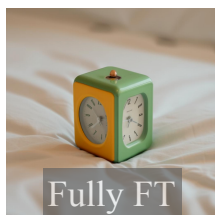

Fully FT

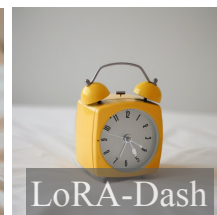

LoRA-Dash

A cube shaped clock

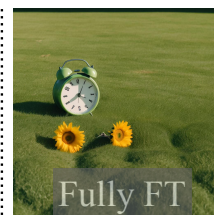

Fully FT

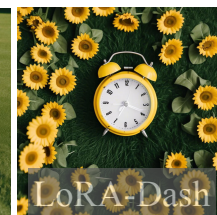

LoRA-Dash

Clock on green grass  
with sunflowers around

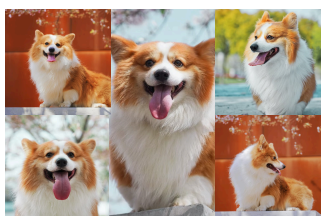

**Input Images: Dog**

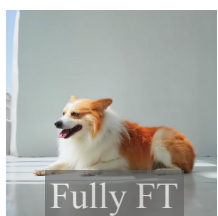

Fully FT

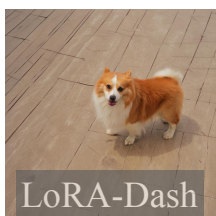

LoRA-Dash

Dog on a wooden floor

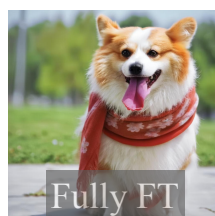

Fully FT

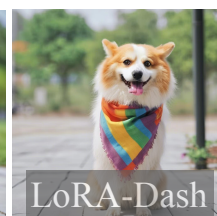

LoRA-Dash

Dog wearing a rainbow scarf

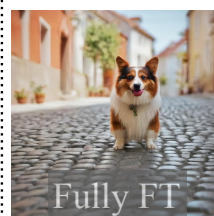

Fully FT

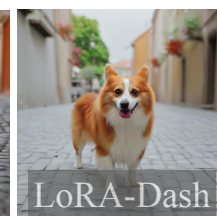

LoRA-Dash

Dog on a cobblestone street

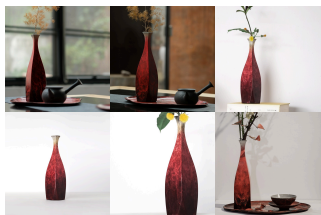

**Input Images: Vase**

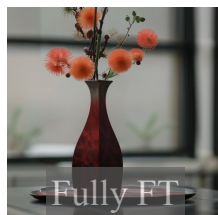

Fully FT

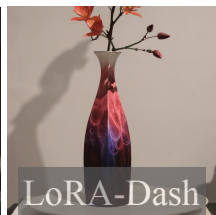

LoRA-Dash

A shiny vase

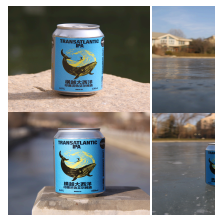

Fully FT

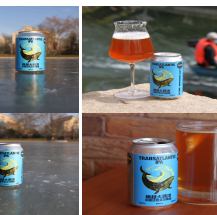

LoRA-Dash

**Input Images: Can**

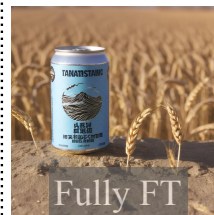

Fully FT

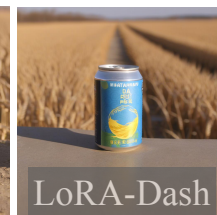

LoRA-Dash

A can with a wheat field  
in the background
